# Supplementary material for: Use of respirator vs. surgical masks in healthcare personnel and its impact on SARS-CoV-2 acquisition – a prospective multicentre cohort study
Source: bioRxiv or medRxiv preprint supplement (doi:10.1101/2021.05.30.21258080), 2021-06-01
Supplement: Supplementary file [file media-1.pdf]

## SUPPLEMENTS

Table S1. Description and categorization of variables used in analyses.

| Variable                                         | Question in Questionnaire                                                                     | Answer possibilities                                                                                                                                                                                                                                                                                                                         | Calculation / Categorisation                        | Timepoint |
|--------------------------------------------------|-----------------------------------------------------------------------------------------------|----------------------------------------------------------------------------------------------------------------------------------------------------------------------------------------------------------------------------------------------------------------------------------------------------------------------------------------------|-----------------------------------------------------|-----------|
| <b>Test results</b>                              |                                                                                               |                                                                                                                                                                                                                                                                                                                                              |                                                     |           |
| Positive SARS-CoV-2 test                         | Did you have a positive SARS CoV-2 swab test?                                                 | True; False                                                                                                                                                                                                                                                                                                                                  | True; False                                         | Weekly    |
| Number of negative swab tests                    | Have you been tested for SARS-CoV-2 in the past week?                                         | True; False                                                                                                                                                                                                                                                                                                                                  | Cumulative number of negative tests up to this date | Weekly    |
|                                                  | What was the result?                                                                          | Positive; Negative; Pending                                                                                                                                                                                                                                                                                                                  |                                                     | Weekly    |
| <b>Exposure to COVID-19</b>                      |                                                                                               |                                                                                                                                                                                                                                                                                                                                              |                                                     |           |
| Frequency of contacts to COVID-19 patients       | How many COVID-19 patients were you exposed to since March 2020?                              | None; 1 to 5; 6 to 10; 11 to 20; more than 20; I don't know                                                                                                                                                                                                                                                                                  | None, 1-20, >20                                     | Follow-up |
| Frequency of contacts to coworkers with COVID-19 | How many SARS-CoV-2 confirmed coworkers were you exposed to since March 2020?                 | 1; 2; 3; 4 or more                                                                                                                                                                                                                                                                                                                           | 1;2;3;4                                             | Follow-up |
| Any positively tested household member           | Has someone of your household or your intimate partner been tested positive since March 2020? | True; False                                                                                                                                                                                                                                                                                                                                  | True; False                                         | Weekly    |
| Patient exposure ( <i>time dependent</i> )       | Did you have contact to a confirmed COVID-19 patient in hospital last week?                   | True; False                                                                                                                                                                                                                                                                                                                                  | True; False                                         | Weekly    |
| Coworker exposure ( <i>time dependent</i> )      | Did you have contact to a SARS-CoV-2 confirmed coworker without wearing a mask last week?     | True; False                                                                                                                                                                                                                                                                                                                                  | True; False                                         | Weekly    |
| Household exposure ( <i>time dependent</i> )     | Has someone from your household been tested positive for SARS-CoV-2 last week?                | True; False                                                                                                                                                                                                                                                                                                                                  | True; False                                         | Weekly    |
| Other exposure ( <i>time dependent</i> )         | Has someone other from your surroundings been tested positive for SARS-CoV-2 last week?       | True; False                                                                                                                                                                                                                                                                                                                                  | True; False                                         | Weekly    |
| <b>Sociodemographic data</b>                     |                                                                                               |                                                                                                                                                                                                                                                                                                                                              |                                                     |           |
| Age                                              | What is your date of birth?                                                                   | Day/Month/Year                                                                                                                                                                                                                                                                                                                               | (2020–birthyear)/10                                 | Baseline  |
| Sex                                              | What is your sex?                                                                             | Male; Female; Not specified                                                                                                                                                                                                                                                                                                                  | Male; Female and other                              | Baseline  |
| Living in Germany or Austria                     | Zip code of your hometown                                                                     | Numbers                                                                                                                                                                                                                                                                                                                                      | GE/AU vs. CH                                        | Baseline  |
| Number of additional persons in household        | How many people live in your place of residence?                                              | Numbers                                                                                                                                                                                                                                                                                                                                      | Numbers from 0 to 4 (larger numbers truncated to 4) | Baseline  |
| Child in household                               | Year of birth for every household contact                                                     | Year                                                                                                                                                                                                                                                                                                                                         | At least one year $\geq$ 2008                       | Baseline  |
| <b>Medical conditions</b>                        |                                                                                               |                                                                                                                                                                                                                                                                                                                                              |                                                     |           |
| Comorbidity                                      | Do you suffer from any of the following diseases?                                             | None; Arterial hypertension; Diabetes mellitus; Heart disease; COPD; Asthma; Liver disease (Fatty liver; Cirrhosis); Cancer; Rheumatologic disease (Arthritis, Lupus, Vasculitis); Hay fever; Hypothyroidism; Chronic inflammatory bowel disease (M. Crohn, Colitis ulcerosa), Intermittent claudication (Peripheral artery disease), Stroke | None = False; All others = True                     | Baseline  |
| Active smoker                                    | Do you smoke or did you use to smoke?                                                         | No; Used to smoke; Active smoker                                                                                                                                                                                                                                                                                                             | Active smoker; other                                | Baseline  |
| Pregnancy during study                           | Are you pregnant at the moment?                                                               | True; False                                                                                                                                                                                                                                                                                                                                  | True; False                                         | Follow-up |
| <b>Behaviour outside of work</b>                 |                                                                                               |                                                                                                                                                                                                                                                                                                                                              |                                                     |           |
| Prophylactic home remedies                       | Which preventive preparation do you take against COVID-19?                                    | None; Echinacea; Zinc; Vitamin C; Umckaloabo/Kaloba; Vitamin B12;                                                                                                                                                                                                                                                                            | None = False; All others =                          | Baseline  |

|                                             |                                                                                                                                                                                    |                                                                                                                                                                                                                                                                                                                                                      |                                                                |           |
|---------------------------------------------|------------------------------------------------------------------------------------------------------------------------------------------------------------------------------------|------------------------------------------------------------------------------------------------------------------------------------------------------------------------------------------------------------------------------------------------------------------------------------------------------------------------------------------------------|----------------------------------------------------------------|-----------|
| Social leisure activities                   | Which activities do you perform regularly at the moment?                                                                                                                           | Homeopathics; Others<br>None; Sportsclub; Choir; Orchestra/Music group (Active musician); Concert/Theatre; Cinema; Church; Yoga/Fitness; Restaurant/Bar<br>At home; Outside; On public transport; While shopping; In hospital area; In the workspace; During contact with other people                                                               | True<br>None = False; All others = True                        | Baseline  |
| Wearing a mask outside work                 | In which situations did you wear a mask?                                                                                                                                           | 1 Very exaggerated/much too long; 2 a bit exaggerated/a bit too long; 3 just perfect; 4 a bit weak/a bit too short; 5 much too weak/much too short                                                                                                                                                                                                   | None = False; All others = True                                | Baseline  |
| Support for stronger public restrictions    | Do you support the national measures and it's duration or what is your opinion about it?                                                                                           | 1 Very exaggerated/much too long; 2 a bit exaggerated/a bit too long; 3 just perfect; 4 a bit weak/a bit too short; 5 much too weak/much too short                                                                                                                                                                                                   | Answers 1-3 = False; Answers 4-5 = True                        | Baseline  |
| <b>HCW specifics</b>                        |                                                                                                                                                                                    |                                                                                                                                                                                                                                                                                                                                                      |                                                                |           |
| Job: nurse                                  | What is your job description?                                                                                                                                                      | Nurse; Medical doctors assistant; Physician; Secretary; Scientist; Physiotherapist; Ergotherapist; Logopedist; Social service; Dietician; Medical technical radiology assistant (MTRA); Housekeeping; Volunteer; Gastronomy/Hotel services; Kitchen; Technical service; Administration (Human resources, management); Informatics; Laboratory; other | Nurse = True; All others = False                               | Baseline  |
| Job: physician                              | What is your job description?                                                                                                                                                      | Physician; Secretary; Scientist; Physiotherapist; Ergotherapist; Logopedist; Social service; Dietician; Medical technical radiology assistant (MTRA); Housekeeping; Volunteer; Gastronomy/Hotel services; Kitchen; Technical service; Administration (Human resources, management); Informatics; Laboratory; other                                   | Physician = True; All others = False                           | Baseline  |
| Full-time job (> 80%)                       | What is your work percentage?                                                                                                                                                      | Percentage (xxx%)                                                                                                                                                                                                                                                                                                                                    | >80% = True; 0-80% = False                                     | Baseline  |
| Involved in AGP                             | In which aerosol-generating procedures have you been involved since March 2020?                                                                                                    | None; In-/Extubation; Bronchoscopy; Reanimation; Tracheal secretion suction; Non-invasive ventilation; Gastroscopy; Transesophageal echocardiography; other                                                                                                                                                                                          | None = False; All others = True                                | Follow-up |
| Working in intensive care                   | In which department do you work?                                                                                                                                                   | List of departments                                                                                                                                                                                                                                                                                                                                  | Intensive care unit = True, All others = False                 | Baseline  |
| <b>Behaviour at work</b>                    |                                                                                                                                                                                    |                                                                                                                                                                                                                                                                                                                                                      |                                                                |           |
| Hygiene knowledge                           | Which are standard hygiene measures?                                                                                                                                               | Cough etiquette; Physical distancing*; Handhygiene; Vaccines; Wearing a gown when in contact with body fluids; Wearing surgical mask when having a cold (* incorrect answer, all others are correct)                                                                                                                                                 | Number of correct answers ≥ 3 = True; < 3 = False              | Baseline  |
| Regular meals in staff restaurant           | How often do you go to the staff restaurant or the cafeteria?                                                                                                                      | None is available; Never; Less than weekly; Weekly, but not daily; Daily; More than daily; No restaurant or cafeteria visits                                                                                                                                                                                                                         | None, never or less than weekly; weekly or more                | Baseline  |
| Handwashing more frequent                   | Do you wash your hands more frequently in the current COVID-19 situation compared to before?                                                                                       | True; False                                                                                                                                                                                                                                                                                                                                          | True; False                                                    | Baseline  |
| <b>Use of personal protective equipment</b> |                                                                                                                                                                                    |                                                                                                                                                                                                                                                                                                                                                      |                                                                |           |
| Always used goggles <sup>1</sup>            | In what situations (during COVID-19 patient contact) did you use goggles?                                                                                                          | 1 Never; 2 Occasionally; 3 Only if a contact with body fluids or secretions is expected; 4 Always                                                                                                                                                                                                                                                    | Answer 4 = True; Answers 1-3 = False                           | Follow-up |
| Always used gloves/gown <sup>1</sup>        | In what situations (during COVID-19 patient contact) did you use gloves?<br>In what situations (during COVID-19 patient contact) did you use a gown?                               | 1 Never; 2 Occasionally; 3 Only if a contact with body fluids or secretions is expected; 4 Always                                                                                                                                                                                                                                                    | Answer 4 (for both gloves and gown) = True; All others = False | Follow-up |
| Mostly used FFP2 <sup>1</sup>               | What mask do you usually wear in contact with COVID-19 patients, when non-aerosol generating procedures are done? Please consider the whole time since the start of the pandemic.  | 1 Always surgical mask; 2 mostly surgical mask; 3 Both surgical mask and FFP2; 4 Mostly FFP2; 5 Always FFP2                                                                                                                                                                                                                                          | Answers 1-3 = False; Answers 4-5 = True                        | Follow-up |
| Always used FFP2 during AGP                 | What mask do you usually wear in contact with COVID-19 patients, when aerosol generating procedures are performed? Please consider the whole time since the start of the pandemic. | 1 Always surgical mask; 2 Mostly surgical mask; 3 Both surgical mask and FFP2; 4 Mostly FFP2; 5 Always FFP2                                                                                                                                                                                                                                          | Answers 1-4 = False; Answer 5 = True                           | Follow-up |

<sup>1</sup> In contact with COVID-19 patients outside of AGPs

Abbreviations: AU – Austria. GE – Germany. HCW – Health care worker. COPD – Chronic obstructive pulmonary disease. AGP – Aerosol-generating procedure. FFP2 – Filtering facepiece class 2.

Table S2. Cox regression analysis (full model and sensitivity analyses) with outcome “SARS-CoV-2- positive nasopharyngeal PCR/rapid antigen test”.

| Participants; Events                               | Full model <sup>1</sup> |          | Sensitivity analysis 1 <sup>1</sup>    |          | Sensitivity analysis 2                             |          | Sensitivity analysis 3 <sup>1</sup>               |          |
|----------------------------------------------------|-------------------------|----------|----------------------------------------|----------|----------------------------------------------------|----------|---------------------------------------------------|----------|
|                                                    | HR (95% CI)             | p        | HR (95% CI)                            | p        | HR (95% CI)                                        | p        | HR (95% CI)                                       | p        |
|                                                    | n=3'259; n=433          |          | n=2'783; n=250                         |          | n=3'259; n=433                                     |          | n=3'067; n=203                                    |          |
|                                                    |                         |          | Excluding HCW with positive households |          | Treating cantons and institutions as fixed effects |          | Restricting analysis to events after Dec 1st 2020 |          |
| <b>Risk or protection factor</b>                   | <b>HR (95% CI)</b>      | <b>p</b> | <b>HR (95% CI)</b>                     | <b>p</b> | <b>HR (95% CI)</b>                                 | <b>p</b> | <b>HR (95% CI)</b>                                | <b>p</b> |
| <b>Exposure to COVID-19</b>                        |                         |          |                                        |          |                                                    |          |                                                   |          |
| Patient exposure ( <i>time dependent</i> )         | 2.24 (1.63-3.10)        | <0.001   | 2.84 (2.05-3.93)                       | <0.001   | 2.11 (1.67-2.66)                                   | <0.001   | 2.07 (1.55-2.76)                                  | <0.001   |
| Coworker exposure ( <i>time dependent</i> )        | 1.58 (1.26-1.99)        | <0.001   | 1.98 (1.58-2.48)                       | <0.001   | 1.56 (1.20-2.04)                                   | 0.001    | 1.48 (1.13-1.94)                                  | 0.004    |
| Household exposure ( <i>time dependent</i> )       | 10.06 (7.48-13.51)      | <0.001   | NA                                     |          | 9.64 (7.66-12.12)                                  | <0.001   | 14.21 (9.66-20.91)                                | <0.001   |
| Other exposure ( <i>time dependent</i> )           | 1.51 (1.31-1.73)        | <0.001   | 1.70 (1.45-2.00)                       | <0.001   | 1.48 (1.20-1.83)                                   | <0.001   | 1.64 (1.22-2.22)                                  | 0.001    |
| Number of negative swabs ( <i>time dependent</i> ) | 0.91 (0.84-0.98)        | 0.008    | 0.94 (0.83-1.05)                       | 0.277    | 0.91 (0.81-1.02)                                   | 0.120    | 0.95 (0.87-1.04)                                  | 0.243    |
| <b>Sociodemographic data</b>                       |                         |          |                                        |          |                                                    |          |                                                   |          |
| Age (per 10 years)                                 | 1.06 (1.00-1.13)        | 0.046    | 0.97 (0.89-1.05)                       | 0.429    | 1.08 (0.98-1.18)                                   | 0.133    | 0.96 (0.88-1.05)                                  | 0.400    |
| Gender: male                                       | 0.78 (0.61-1.01)        | 0.058    | 0.50 (0.38-0.66)                       | <0.001   | 0.82 (0.60-1.11)                                   | 0.191    | 0.64 (0.36-1.15)                                  | 0.137    |
| Living in Germany or Austria                       | 1.10 (0.71-1.70)        | 0.667    | 0.92 (0.40-2.11)                       | 0.837    | NA                                                 |          | 0.69 (0.35-1.38)                                  | 0.295    |
| Child in household                                 | 1.13 (0.93-1.38)        | 0.228    | 0.69 (0.55-0.87)                       | 0.002    | 1.10 (0.86-1.40)                                   | 0.458    | 1.70 (1.25-2.29)                                  | 0.001    |
| <b>Medical conditions</b>                          |                         |          |                                        |          |                                                    |          |                                                   |          |
| Comorbidity                                        | 0.99 (0.81-1.20)        | 0.895    | 1.01 (0.76-1.33)                       | 0.965    | 1.00 (0.82-1.23)                                   | 0.982    | 0.99 (0.72-1.34)                                  | 0.923    |
| Active smoking                                     | 0.65 (0.49-0.86)        | 0.003    | 0.59 (0.41-0.85)                       | 0.005    | 0.66 (0.50-0.89)                                   | 0.006    | 0.55 (0.29-1.06)                                  | 0.074    |
| Pregnancy during study                             | 1.37 (1.05-1.77)        | 0.019    | 1.27 (0.68-2.36)                       | 0.458    | 1.37 (0.87-2.16)                                   | 0.172    | 2.03 (1.33-3.09)                                  | 0.001    |
| <b>Behaviour outside of work</b>                   |                         |          |                                        |          |                                                    |          |                                                   |          |
| Prophylactic home remedies                         | 1.08 (0.82-1.42)        | 0.598    | 1.00 (0.76-1.30)                       | 0.974    | 1.07 (0.82-1.40)                                   | 0.599    | 1.30 (0.94-1.78)                                  | 0.107    |
| Social leisure activities                          | 0.93 (0.79-1.09)        | 0.357    | 0.79 (0.67-0.94)                       | 0.007    | 0.91 (0.74-1.10)                                   | 0.324    | 1.04 (0.79-1.37)                                  | 0.781    |
| Wearing a mask outside work                        | 0.74 (0.56-0.99)        | 0.040    | 0.69 (0.43-1.11)                       | 0.127    | 0.75 (0.58-0.97)                                   | 0.026    | 0.84 (0.64-1.11)                                  | 0.222    |
| Support for stronger public restrictions           | 0.88 (0.73-1.05)        | 0.161    | 0.92 (0.67-1.27)                       | 0.619    | 0.96 (0.73-1.25)                                   | 0.749    | 1.11 (0.76-1.62)                                  | 0.593    |
| <b>HCW specifics</b>                               |                         |          |                                        |          |                                                    |          |                                                   |          |
| Job: nurse                                         | 1.20 (1.03-1.39)        | 0.020    | 1.43 (1.12-1.83)                       | 0.004    | 1.15 (0.89-1.49)                                   | 0.276    | 1.24 (0.94-1.63)                                  | 0.127    |
| Job: physician                                     | 0.87 (0.65-1.15)        | 0.328    | 1.10 (0.73-1.67)                       | 0.650    | 0.82 (0.58-1.15)                                   | 0.256    | 0.90 (0.55-1.46)                                  | 0.669    |
| Full-time job (> 80%)                              | 1.10 (0.94-1.27)        | 0.230    | 1.10 (0.90-1.34)                       | 0.347    | 1.08 (0.85-1.39)                                   | 0.521    | 1.51 (1.05-2.16)                                  | 0.026    |
| Involved in AGP                                    | 1.18 (0.96-1.45)        | 0.114    | 1.21 (0.90-1.62)                       | 0.217    | 1.13 (0.91-1.40)                                   | 0.266    | 1.31 (1.04-1.67)                                  | 0.024    |
| Working in intensive care                          | 0.77 (0.53-1.12)        | 0.170    | 0.63 (0.42-0.94)                       | 0.025    | 0.74 (0.50-1.10)                                   | 0.142    | 1.02 (0.63-1.66)                                  | 0.924    |
| <b>Behaviour at work</b>                           |                         |          |                                        |          |                                                    |          |                                                   |          |
| Hygiene knowledge                                  | 1.09 (0.91-1.32)        | 0.342    | 1.01 (0.71-1.44)                       | 0.964    | 1.00 (0.75-1.34)                                   | 0.976    | 1.30 (0.96-1.75)                                  | 0.089    |
| Regular meals in staff restaurant                  | 1.16 (1.00-1.36)        | 0.058    | 1.13 (0.95-1.34)                       | 0.173    | 1.15 (0.93-1.43)                                   | 0.199    | 1.16 (0.84-1.59)                                  | 0.373    |

**Use of personal protective equipment**

|                                      |                         |              |                         |              |                         |              |                         |              |
|--------------------------------------|-------------------------|--------------|-------------------------|--------------|-------------------------|--------------|-------------------------|--------------|
| Always used goggles <sup>2</sup>     | 0·81 (0·58-1·12)        | 0·201        | 0·81 (0·53-1·25)        | 0·342        | 0·88 (0·67-1·16)        | 0·375        | 0·66 (0·40-1·08)        | 0·100        |
| Always used gloves/gown <sup>2</sup> | 1·11 (0·71-1·73)        | 0·644        | 1·11 (0·69-1·80)        | 0·664        | 1·07 (0·81-1·41)        | 0·636        | 1·16 (0·69-1·96)        | 0·572        |
| <b>Mostly used FFP2<sup>2</sup></b>  | <b>0·80 (0·64-1·00)</b> | <b>0·052</b> | <b>0·82 (0·54-1·25)</b> | <b>0·360</b> | <b>0·88 (0·66-1·18)</b> | <b>0·402</b> | <b>0·73 (0·55-0·97)</b> | <b>0·029</b> |

<sup>1</sup> Institutions and living place (canton) included in model as random cluster term

<sup>2</sup> Germany/Austria treated like separate cantons and included as fixed effects

<sup>3</sup> In contact with COVID-19 patients outside of AGPs

Abbreviations: PCR – Polymerase chain reaction. HCW – Health care worker. AGP – Aerosol-generating procedure. FFP2 – Filtering facepiece class 2. NA – Not applicable

Table S3. Results of multivariable logistic regression analysis (full model and sensitivity analyses) regarding outcome “SARS-CoV-2 seroconversion”.

| Risk or protection factor                          | Full model <sup>1</sup> |               | Sensitivity analysis 1 <sup>1</sup>    |               | Sensitivity analysis 2                             |               |
|----------------------------------------------------|-------------------------|---------------|----------------------------------------|---------------|----------------------------------------------------|---------------|
|                                                    | Participants; Events    | n=2916; n=511 | Excluding HCW with positive households | n=2491; n=335 | Treating cantons and institutions as fixed effects | n=2916; n=511 |
|                                                    | OR (95% CI)             | p             | OR (95% CI)                            | p             | OR (95% CI)                                        | p             |
| <b>Sociodemographic data</b>                       |                         |               |                                        |               |                                                    |               |
| Age (per 10 years)                                 | 0.96 (0.87 - 1.07)      | 0.475         | 0.92 (0.82 - 1.04)                     | 0.177         | 0.96 (0.86 - 1.06)                                 | 0.422         |
| Sex: male                                          | 0.86 (0.62 - 1.18)      | 0.349         | 0.77 (0.53 - 1.13)                     | 0.176         | 0.86 (0.62 - 1.19)                                 | 0.368         |
| Living in Germany or Austria                       | 0.86 (0.47 - 1.58)      | 0.628         | 0.81 (0.42 - 1.55)                     | 0.522         | NA                                                 |               |
| No of additional persons in households             | 0.88 (0.79 - 0.98)      | 0.016         | 0.86 (0.76 - 0.98)                     | 0.022         | 0.87 (0.78 - 0.97)                                 | 0.013         |
| Child in household                                 | 0.97 (0.71 - 1.34)      | 0.859         | 0.73 (0.48 - 1.10)                     | 0.132         | 0.98 (0.71 - 1.35)                                 | 0.880         |
| Any positively tested household member             | 5.01 (3.89 - 6.46)      | <0.001        | NA                                     |               | 5.11 (3.96 - 6.60)                                 | <0.001        |
| <b>Medical conditions</b>                          |                         |               |                                        |               |                                                    |               |
| Comorbidity                                        | 0.93 (0.74 - 1.16)      | 0.506         | 0.96 (0.74 - 1.24)                     | 0.732         | 0.93 (0.74 - 1.16)                                 | 0.507         |
| Active smoking                                     | 0.57 (0.41 - 0.79)      | <0.001        | 0.56 (0.39 - 0.82)                     | 0.002         | 0.57 (0.41 - 0.78)                                 | 0.001         |
| Pregnancy during study                             | 1.01 (0.56 - 1.82)      | 0.979         | 0.91 (0.45 - 1.86)                     | 0.802         | 0.99 (0.53 - 1.74)                                 | 0.969         |
| <b>Behaviour outside of work</b>                   |                         |               |                                        |               |                                                    |               |
| Prophylactic home remedies                         | 1.21 (0.90 - 1.63)      | 0.205         | 1.14 (0.81 - 1.62)                     | 0.448         | 1.21 (0.89 - 1.63)                                 | 0.211         |
| Social leisure activities                          | 1.02 (0.82 - 1.27)      | 0.847         | 0.92 (0.72 - 1.18)                     | 0.517         | 1.02 (0.82 - 1.27)                                 | 0.863         |
| Wearing a mask outside work                        | 0.96 (0.74 - 1.25)      | 0.779         | 0.92 (0.68 - 1.24)                     | 0.588         | 0.97 (0.74 - 1.27)                                 | 0.833         |
| Support for stronger public restrictions           | 0.85 (0.64 - 1.14)      | 0.282         | 0.93 (0.67 - 1.29)                     | 0.657         | 0.88 (0.65 - 1.17)                                 | 0.386         |
| <b>HCW specifics</b>                               |                         |               |                                        |               |                                                    |               |
| Job: nurse                                         | 1.55 (1.18 - 2.04)      | 0.001         | 1.83 (1.33 - 2.52)                     | <0.001        | 1.56 (1.19 - 2.06)                                 | 0.002         |
| Job: physician                                     | 0.84 (0.59 - 1.21)      | 0.360         | 0.88 (0.57 - 1.36)                     | 0.562         | 0.84 (0.58 - 1.20)                                 | 0.337         |
| Full-time job (> 80%)                              | 1.08 (0.83 - 1.42)      | 0.566         | 1.11 (0.81 - 1.51)                     | 0.521         | 1.10 (0.84 - 1.44)                                 | 0.509         |
| Involved in AGP                                    | 0.96 (0.75 - 1.24)      | 0.775         | 1.03 (0.78 - 1.37)                     | 0.820         | 0.95 (0.74 - 1.21)                                 | 0.659         |
| Working in ICU                                     | 0.43 (0.27 - 0.68)      | <0.001        | 0.40 (0.22 - 0.71)                     | 0.002         | 0.43 (0.27 - 0.68)                                 | <0.001        |
| Frequency of contacts with COVID-19 patients       | 1.51 (1.38 - 1.66)      | <0.001        | 1.50 (1.35 - 1.68)                     | <0.001        | 1.51 (1.38 - 1.67)                                 | <0.001        |
| Frequency of contacts with coworkers with COVID-19 | 1.22 (1.10 - 1.36)      | <0.001        | 1.18 (1.05 - 1.33)                     | 0.007         | 1.22 (1.10 - 1.36)                                 | <0.001        |
| <b>Behaviour at work</b>                           |                         |               |                                        |               |                                                    |               |
| Hygiene knowledge                                  | 1.06 (0.77 - 1.46)      | 0.698         | 1.12 (0.76 - 1.65)                     | 0.562         | 1.03 (0.75 - 1.44)                                 | 0.834         |
| Regular meals in staff restaurant                  | 1.12 (0.88 - 1.41)      | 0.363         | 1.06 (0.81 - 1.40)                     | 0.657         | 1.12 (0.88 - 1.42)                                 | 0.362         |
| <b>Use of personal protective equipment</b>        |                         |               |                                        |               |                                                    |               |
| Always used goggles <sup>2</sup>                   | 0.91 (0.68 - 1.22)      | 0.521         | 0.99 (0.71 - 1.39)                     | 0.953         | 0.94 (0.70 - 1.26)                                 | 0.677         |

|                                      |                           |              |                           |              |                           |              |
|--------------------------------------|---------------------------|--------------|---------------------------|--------------|---------------------------|--------------|
| Always used gloves/gown <sup>2</sup> | 0·81 (0·59 - 1·11)        | 0·182        | 0·79 (0·55 - 1·13)        | 0·197        | 0·80 (0·58 - 1·10)        | 0·170        |
| <b>Mostly used FFP2<sup>2</sup></b>  | <b>0·73 (0·53 - 1·00)</b> | <b>0·053</b> | <b>0·69 (0·48 - 0·99)</b> | <b>0·046</b> | <b>0·76 (0·55 - 1·04)</b> | <b>0·088</b> |

<sup>1</sup>Institutions and living place (canton) included in model as random cluster term. For Sensitivity Analysis 2, the effects of these factors are not shown in the table.

<sup>2</sup>In contact with COVID-19 patients outside of AGPs

Abbreviations: HCW – Health care worker. AGP – Aerosol-generating procedure. FFP2 – Filtering facepiece class 2. NA – Not applicable.

Table S4. Subgroup analysis of HCW with frequent COVID-19 exposure vs. HCW with less frequent COVID-19 exposure; A) Cox regression (outcome SARS-CoV-2 positive swab); B) multivariable logistic regression (outcome SARS-CoV-2 seroconversion).

A) Cox Regression

| Risk or protection factor                          | Participants; Events | 1–20 COVID-19 patient contacts |        | >20 COVID-19 patient contacts |        |
|----------------------------------------------------|----------------------|--------------------------------|--------|-------------------------------|--------|
|                                                    |                      | n = 1292; n = 149              |        | n = 1120; n = 215             |        |
|                                                    |                      | HR                             | p      | HR                            | p      |
| <b>Exposure to COVID-19</b>                        |                      |                                |        |                               |        |
| Patient exposure ( <i>time dependent</i> )         |                      | 2.09 (1.66-2.62)               | <0.001 | 1.52 (0.93-2.49)              | 0.099  |
| Coworker exposure ( <i>time dependent</i> )        |                      | 1.64 (1.09-2.46)               | 0.018  | 1.61 (0.99-2.63)              | 0.055  |
| Household exposure ( <i>time dependent</i> )       |                      | 13.93 (9.64-20.12)             | <0.001 | 6.49 (4.02-10.47)             | <0.001 |
| Other exposure ( <i>time dependent</i> )           |                      | 1.71 (1.36-2.14)               | <0.001 | 1.20 (0.86-1.66)              | 0.286  |
| Number of negative swabs ( <i>time dependent</i> ) |                      | 0.88 (0.76-1.01)               | 0.060  | 0.93 (0.83-1.03)              | 0.143  |
| <b>Sociodemographic data</b>                       |                      |                                |        |                               |        |
| Age (per 10 years)                                 |                      | 1.10 (0.99-1.22)               | 0.086  | 1.05 (0.95-1.15)              | 0.338  |
| Sex:male                                           |                      | 0.53 (0.29-0.98)               | 0.042  | 0.86 (0.63-1.17)              | 0.334  |
| Living in Germany or Austria                       |                      | 1.20 (0.35-4.06)               | 0.775  | 1.11 (0.49-2.52)              | 0.794  |
| Child in household                                 |                      | 0.93 (0.65-1.34)               | 0.710  | 1.24 (0.84-1.84)              | 0.283  |
| <b>Medical conditions</b>                          |                      |                                |        |                               |        |
| Comorbidity                                        |                      | 0.95 (0.71-1.27)               | 0.705  | 0.99 (0.72-1.35)              | 0.938  |
| Active smoking                                     |                      | 0.72 (0.38-1.36)               | 0.307  | 0.61 (0.32-1.14)              | 0.120  |
| Pregnancy during study                             |                      | 1.41 (0.87-2.29)               | 0.165  | 0.88 (0.40-1.94)              | 0.745  |
| <b>Behaviour outside of work</b>                   |                      |                                |        |                               |        |
| Prophylactic home remedies                         |                      | 1.02 (0.70-1.49)               | 0.909  | 1.09 (0.76-1.58)              | 0.640  |
| Social leisure activities                          |                      | 1.03 (0.76-1.41)               | 0.836  | 0.91 (0.73-1.12)              | 0.373  |
| Wearing a mask outside work                        |                      | 0.70 (0.47-1.04)               | 0.078  | 0.82 (0.61-1.11)              | 0.193  |
| Support for stronger public restrictions           |                      | 0.91 (0.57-1.48)               | 0.715  | 0.81 (0.65-1.02)              | 0.076  |
| <b>HCW specifics</b>                               |                      |                                |        |                               |        |
| Job: nurse                                         |                      | 1.20 (0.74-1.94)               | 0.450  | 1.77 (1.30-2.41)              | <0.001 |
| Job: physician                                     |                      | 0.53 (0.30-0.94)               | 0.029  | 1.48 (0.91-2.39)              | 0.111  |
| Full-time job (> 80%)                              |                      | 1.10 (0.79-1.53)               | 0.561  | 1.09 (0.85-1.39)              | 0.504  |
| Involved in AGP                                    |                      | 1.08 (0.88-1.34)               | 0.453  | 1.12 (0.76-1.65)              | 0.566  |
| Working in intensive care                          |                      | 0.64 (0.35-1.17)               | 0.149  | 0.67 (0.45-0.99)              | 0.046  |
| <b>Behaviour at work</b>                           |                      |                                |        |                               |        |
| Hygiene knowledge                                  |                      | 1.12 (0.80-1.57)               | 0.521  | 1.07 (0.78-1.46)              | 0.691  |
| Regular meals in staff restaurant                  |                      | 1.28 (0.89-1.84)               | 0.186  | 1.02 (0.80-1.30)              | 0.879  |
| <b>Use of personal protective equipment</b>        |                      |                                |        |                               |        |
| Always goggles <sup>1</sup>                        |                      | 0.76 (0.45-1.29)               | 0.309  | 0.93 (0.68-1.27)              | 0.664  |

|                                           |                         |              |                         |                  |
|-------------------------------------------|-------------------------|--------------|-------------------------|------------------|
| Always gloves/gown <sup>1</sup>           | 0.82 (0.42-1.61)        | 0.562        | 1.28 (0.92-1.78)        | 0.147            |
| <b>Mostly using FFP2 mask<sup>1</sup></b> | <b>1.06 (0.70-1.63)</b> | <b>0.774</b> | <b>0.66 (0.54-0.81)</b> | <b>&lt;0.001</b> |

### B) Multivariable Logistic Regression

| Risk or protection factor                        | Participants; Events | 1–20 COVID-19 patient contacts |              | > 20 COVID-19 patient contacts |              |
|--------------------------------------------------|----------------------|--------------------------------|--------------|--------------------------------|--------------|
|                                                  |                      | n = 1156; n = 164              |              | n = 1019; n = 272              |              |
|                                                  |                      | OR (95% CI)                    | p            | OR (95% CI)                    | p            |
| <b>Exposure to COVID-19</b>                      |                      |                                |              |                                |              |
| Frequency of contacts to coworkers with COVID-19 |                      | 1.22 (1.02 - 1.45)             | 0.032        | 1.23 (1.04 - 1.45)             | 0.016        |
| Any positively tested household member           |                      | 3.97 (2.60 - 6.06)             | <0.001       | 5.28 (3.59 - 7.78)             | <0.001       |
| <b>Sociodemographic data</b>                     |                      |                                |              |                                |              |
| Age (per 10 years)                               |                      | 1.03 (0.86 - 1.22)             | 0.776        | 0.91 (0.78 - 1.06)             | 0.233        |
| Sex:male                                         |                      | 0.66 (0.37 - 1.20)             | 0.175        | 0.95 (0.62 - 1.47)             | 0.822        |
| Living in Germany or Austria                     |                      | 1.28 (0.51 - 3.22)             | 0.606        | 0.74 (0.35 - 1.57)             | 0.427        |
| Number of additional persons in household        |                      | 0.94 (0.78 - 1.14)             | 0.536        | 0.86 (0.74 - 1.01)             | 0.066        |
| Child in household                               |                      | 0.81 (0.46 - 1.41)             | 0.450        | 1.08 (0.67 - 1.72)             | 0.759        |
| <b>Medical conditions</b>                        |                      |                                |              |                                |              |
| Comorbidity                                      |                      | 0.76 (0.52 - 1.13)             | 0.173        | 1.02 (0.74 - 1.42)             | 0.890        |
| Active smoking                                   |                      | 0.76 (0.46 - 1.27)             | 0.296        | 0.49 (0.30 - 0.80)             | 0.004        |
| Pregnancy during study                           |                      | 1.13 (0.47 - 2.75)             | 0.781        | 0.79 (0.28 - 2.24)             | 0.657        |
| <b>Behaviour outside of work</b>                 |                      |                                |              |                                |              |
| Prophylactic home remedies                       |                      | 1.29 (0.80 - 2.10)             | 0.298        | 1.11 (0.69 - 1.80)             | 0.665        |
| Social leisure activities                        |                      | 1.02 (0.71 - 1.46)             | 0.931        | 1.10 (0.80 - 1.52)             | 0.545        |
| Wearing a mask outside work                      |                      | 0.82 (0.51 - 1.29)             | 0.388        | 1.18 (0.80 - 1.74)             | 0.404        |
| Support for stronger public restrictions         |                      | 1.01 (0.62 - 1.66)             | 0.970        | 0.83 (0.54 - 1.27)             | 0.395        |
| <b>HCW specifics</b>                             |                      |                                |              |                                |              |
| Job: nurse                                       |                      | 1.39 (0.89 - 2.17)             | 0.151        | 2.22 (1.40 - 3.52)             | <0.001       |
| Job: physician                                   |                      | 0.50 (0.26 - 0.96)             | 0.038        | 1.33 (0.78 - 2.28)             | 0.298        |
| Full-time job (> 80%)                            |                      | 1.31 (0.82 - 2.08)             | 0.254        | 0.97 (0.64 - 1.48)             | 0.901        |
| Involved in AGP                                  |                      | 1.35 (0.90 - 2.03)             | 0.144        | 0.82 (0.58 - 1.15)             | 0.251        |
| Working in intensive care                        |                      | 0.33 (0.11 - 1.00)             | 0.049        | 0.51 (0.30 - 0.87)             | 0.015        |
| <b>Behaviour at work</b>                         |                      |                                |              |                                |              |
| Hygiene knowledge                                |                      | 0.99 (0.59 - 1.65)             | 0.968        | 1.12 (0.65 - 1.93)             | 0.691        |
| Regular meals in staff restaurant                |                      | 1.53 (1.03 - 2.28)             | 0.037        | 1.03 (0.72 - 1.47)             | 0.886        |
| <b>Use of personal protective equipment</b>      |                      |                                |              |                                |              |
| Always goggles <sup>1</sup>                      |                      | 0.90 (0.54 - 1.51)             | 0.703        | 1.06 (0.72 - 1.58)             | 0.755        |
| Always gloves/gown <sup>1</sup>                  |                      | 0.60 (0.35 - 1.03)             | 0.065        | 0.98 (0.64 - 1.49)             | 0.915        |
| <b>Mostly using FFP2 mask<sup>1</sup></b>        |                      | <b>0.75 (0.42 - 1.32)</b>      | <b>0.320</b> | <b>0.64 (0.42 - 0.97)</b>      | <b>0.036</b> |

<sup>1</sup>In contact with COVID-19 patients outside of AGPs

Abbreviations: HCW – Health care worker. AGP – Aerosol-generating procedure. FFP2 – Filtering facepiece class 2. NA – not applicable



Table S5. Subgroup analysis of HCW performing AGP: A) Cox regression (outcome SARS-CoV-2 positive swab); B) multivariable logistic regression (outcome SARS-CoV-2 seroconversion).

| A) Cox Regression                                  | Participants; Events | Participants involved in AGP |              |
|----------------------------------------------------|----------------------|------------------------------|--------------|
|                                                    |                      | n = 1204; n = 188            |              |
| <b>Risk or protection factor</b>                   |                      | <b>HR</b>                    | <b>p</b>     |
| <b>Exposure to COVID-19</b>                        |                      |                              |              |
| Patient exposure ( <i>time dependent</i> )         |                      | 1.50 (0.98-2.32)             | 0.065        |
| Coworker exposure ( <i>time dependent</i> )        |                      | 1.72 (1.24-2.37)             | 0.001        |
| Household exposure ( <i>time dependent</i> )       |                      | 9.75 (6.28-15.14)            | <0.001       |
| Other exposure ( <i>time dependent</i> )           |                      | 1.42 (1.07-1.88)             | 0.015        |
| Number of negative swabs ( <i>time dependent</i> ) |                      | 0.88 (0.75-1.03)             | 0.108        |
| <b>Sociodemographic data</b>                       |                      |                              |              |
| Age (per 10 years)                                 |                      | 1.02 (0.88-1.19)             | 0.776        |
| Sex:male                                           |                      | 0.87 (0.57-1.33)             | 0.531        |
| Living in Germany or Austria                       |                      | 1.46 (0.79-2.67)             | 0.224        |
| Child in household                                 |                      | 1.15 (0.88-1.50)             | 0.297        |
| <b>Medical conditions</b>                          |                      |                              |              |
| Comorbidity                                        |                      | 1.13 (0.85-1.49)             | 0.402        |
| Active smoking                                     |                      | 0.65 (0.37-1.13)             | 0.129        |
| Pregnancy during study                             |                      | 0.56 (0.13-2.38)             | 0.433        |
| <b>Behaviour outside of work</b>                   |                      |                              |              |
| Prophylactic home remedies                         |                      | 1.11 (0.67-1.83)             | 0.685        |
| Social leisure activities                          |                      | 0.98 (0.77-1.26)             | 0.900        |
| Wearing a mask outside work                        |                      | 0.75 (0.51-1.11)             | 0.157        |
| Support for stronger public restrictions           |                      | 0.91 (0.69-1.20)             | 0.512        |
| <b>HCW specifics</b>                               |                      |                              |              |
| Job: nurse                                         |                      | 1.17 (0.87-1.58)             | 0.309        |
| Job: physician                                     |                      | 1.12 (0.64-1.96)             | 0.697        |
| Full-time job (> 80%)                              |                      | 0.95 (0.65-1.37)             | 0.767        |
| Working in intensive care                          |                      | 0.77 (0.48-1.24)             | 0.277        |
| <b>Behaviour at work</b>                           |                      |                              |              |
| Hygiene knowledge                                  |                      | 1.72 (1.03-2.88)             | 0.039        |
| Regular meals in staff restaurant                  |                      | 1.00 (0.67-1.47)             | 0.981        |
| <b>Use of personal protective equipment</b>        |                      |                              |              |
| Always goggles <sup>1</sup>                        |                      | 0.78 (0.59-1.03)             | 0.075        |
| Always gloves/gown <sup>1</sup>                    |                      | 1.11 (0.67-1.82)             | 0.686        |
| <b>Mostly using FFP2 mask<sup>1</sup></b>          |                      | <b>0.71 (0.50-1.01)</b>      | <b>0.059</b> |

|                                                  |                                     |              |
|--------------------------------------------------|-------------------------------------|--------------|
| Always using FFP2 mask during AGP                | 1.08 (0.71-1.64)                    | 0.726        |
| <b>B) Multivariable Logistic Regression</b>      |                                     |              |
|                                                  | <b>Participants involved in AGP</b> |              |
| Participants; Events                             | n = 1087; n = 216                   |              |
| <b>Risk or protection factor</b>                 | <b>OR (95% CI)</b>                  | <b>p</b>     |
| <b>Exposure to COVID-19</b>                      |                                     |              |
| Frequency of contacts to COVID-19 patients       | 1.44 (1.22 - 1.70)                  | <0.001       |
| Frequency of contacts to coworkers with COVID-19 | 1.27 (1.06 - 1.51)                  | 0.008        |
| Any positively tested household member           | 4.69 (3.14 - 7.00)                  | <0.001       |
| <b>Sociodemographic data</b>                     |                                     |              |
| Age (per 10 years)                               | 1.01 (0.85 - 1.19)                  | 0.951        |
| Sex:male                                         | 0.99 (0.64 - 1.53)                  | 0.953        |
| Living in Germany or Austria                     | 1.38 (0.65 - 2.91)                  | 0.404        |
| Number of additional persons in households       | 0.89 (0.75 - 1.06)                  | 0.185        |
| Child in household                               | 0.90 (0.53 - 1.52)                  | 0.693        |
| <b>Medical conditions</b>                        |                                     |              |
| Comorbidity                                      | 1.08 (0.76 - 1.52)                  | 0.667        |
| Active smoking                                   | 0.46 (0.28 - 0.78)                  | 0.004        |
| Pregnancy during study                           | 1.25 (0.39 - 3.95)                  | 0.708        |
| <b>Behaviour outside of work</b>                 |                                     |              |
| Prophylactic home remedies                       | 1.41 (0.88 - 2.25)                  | 0.149        |
| Social leisure activities                        | 1.05 (0.75 - 1.47)                  | 0.786        |
| Wearing a mask outside work                      | 0.84 (0.56 - 1.26)                  | 0.404        |
| Support for stronger public restrictions         | 1.11 (0.73 - 1.69)                  | 0.633        |
| <b>HCW specifics</b>                             |                                     |              |
| Job: nurse                                       | 1.28 (0.78 - 2.09)                  | 0.330        |
| Job: physician                                   | 0.97 (0.55 - 1.73)                  | 0.930        |
| Full-time job (> 80%)                            | 0.95 (0.62 - 1.46)                  | 0.822        |
| Working in intensive care                        | 0.44 (0.27 - 0.74)                  | 0.002        |
| <b>Behaviour at work</b>                         |                                     |              |
| Hygiene knowledge                                | 1.81 (0.94 - 3.50)                  | 0.077        |
| Regular meals in staff restaurant                | 1.09 (0.75 - 1.59)                  | 0.645        |
| <b>Use of personal protective equipment</b>      |                                     |              |
| Always used goggles <sup>1</sup>                 | 0.89 (0.59 - 1.32)                  | 0.552        |
| Always used gloves/gown <sup>1</sup>             | 0.86 (0.56 - 1.34)                  | 0.518        |
| <b>Mostly used FFP2 mask<sup>1</sup></b>         | <b>0.66 (0.43 - 1.01)</b>           | <b>0.055</b> |
| Always used FFP2 mask during AGP                 | 0.89 (0.62 - 1.28)                  | 0.535        |

<sup>1</sup> In contact with COVID-19 patients outside of AGPs

Abbreviations: HCW – Health care worker. AGP – Aerosol-generating procedure. FFP2 – Filtering facepiece class 2. NA – not applicable
